# Supplementary material for: Comparative evaluation of machine learning models for museum exhibit recognition from video-derived datasets
Source: PeerJ journal article supplement (doi:10.7717/peerj-cs.3207), 2025-10-02
Supplement: Algorithm_1.docx [file Algorithm_1.docx]

**Algorithm 1: Training and Evaluation of Deep Learning Models**

1. Set training parameters:

- batch_size ← 16

- image_size ← (224, 224)

- epochs ← 300

2. For each class in Datasets:

count ← number of images in class

log class distribution

3. Initialize ImageDataGenerator with:

- rescale, rotation, shifts, zoom, flip, brightness adjustment (±20%)

- validation_split = 0.2

4. Create training and validation generators from Datasets using ImageDataGenerator (80% training, 20 validation)

5. For each model architecture do:

a. Load base model (YOLOv8, MobileNetV3, ResNetV2, EfficientNetV2, VGG16, ConvNeXt-Tiny, SwinV2-Base, DaViT) with pretrained weights (e.g., ImageNet)

b. Freeze layers if needed (partial fine-tuning)

c. Build final model:

- BatchNormalization

- GlobalAveragePooling

- Dropout

- Dense softmax output layer (num_classes)

d. Compile model:

- Optimizer: Adam

- Loss: SparseCategoricalCrossentropy

- Metric: Accuracy

e. Define callbacks:

- ReduceLROnPlateau

- EarlyStopping

f. Train model on training set with validation

g. Save trained model in Keras format

h. Convert and save model in TFLite format

i. Evaluate model on validation set:

- Predict class probabilities

- Compute predictions using argmax

- Generate normalized confusion matrix

- Print classification report (Precision, Recall, F1)

- Plot F1-confidence curve

- Compute mean average precision (mAP@0.5 and mAP@0.5:0.95)
