# Supplementary material for: Comparative evaluation of machine learning models for museum exhibit recognition from video-derived datasets
Source: PeerJ journal article supplement (doi:10.7717/peerj-cs.3207), 2025-10-02
Supplement: Dataset.xlsx [file Dataset.xlsx]

## Sheet: Лист1
	Name	Class name	Pictures	Category		Link to the full dataset: Dataset iteration 1 https://eduiitu-my.sharepoint.com/:u:/g/personal/d_tsoy_iitu_edu_kz/Een5GKe0TRhOvVKN2ewhh7MBV8f_yY392OSy-OKSfgRwuQ?e=CgByNx Dataset iteration 2 https://eduiitu-my.sharepoint.com/:u:/g/personal/d_tsoy_iitu_edu_kz/EUU1GJ4-hMVLhefyaY-bMi8BZsYU1Ye9m7KUrunpkz3d4w?e=gNxjTZ
1	Camel sculpture	0: camel sculpture		Sculpture
2	Ram	1: ram	#VALUE!	Sculpture
3	Three sculptures of people in the form of spheres	2: three sculptures with spheres	#VALUE!	Sculpture
4	Black triangular vase	3: black vase	#VALUE!	Decorative Art​
5	Saukele (traditional Kazakh headdress for brides)	4: saukele (traditional headdress)	#VALUE!	Decorative Art​
6	Grazing rams	5: grazing rams	#VALUE!	Painting
7	Vase separately	6: separate vase	#VALUE!	Sculpture
8	Robe	7: robe	#VALUE!	Sculpture
9	Flowering apple tree	8: apple tree	#VALUE!	Painting
10	Wineskin separately	9: separate wineskin	#VALUE!	Decorative Art​
11	Utensils for making kumis	10: dish for kumis 11: container for preparing kumis	#VALUE!	Decorative Art​
12	Chest 1	12: chest (sandyk)	#VALUE!	Decorative Art​
13	Dombra (Kazakh musical instrument)	13: dombra	#VALUE!	Decorative Art​
14	Saddle 1	14: saddle 1	#VALUE!	Decorative Art​
15	Saddle 2	15: saddle 2	#VALUE!	Decorative Art​
16	Kobyz + vase + tapestries	16: kobyz, vase, tapestry	#VALUE!	Mixed Art
17	Tapestry ornament (alasha)	17: ornament tapestry (alasha)	#VALUE!	Tapestry Art
18	Jewelry	18: jewelry	#VALUE!	Jewelry Art
19	Fancy vase with handles	19: fancy vase	#VALUE!	Decorative Art​
20	Bright tapestry of a lady with hands up	20: bright tapestry (lady)	#VALUE!	Tapestry Art
21	Man with a sword (or whip) and in a hat	21: man with sword	#VALUE!	Painting
22	Zhambyl (Kazakh poet)	22: Jambyl	#VALUE!	Painting
23	Revolution in the village	23: revolution in the aul	#VALUE!	Painting
24	Decorative vase with petroglyphs, Dosmagambetova Gulnara	23: Decorative vase with petroglyphs	#VALUE!	Sculpture
25	Abstract felt on a round base	25: felt on a round base (abstract)	#VALUE!	Tapestry Art
26	Falconer with a bird up close	26: berkutchi with bird	#VALUE!	Painting
27	Turtskyb (possibly name or title — unclear without context)	27: Turksib	#VALUE!	Painting
28	Shokan (Valikhanov) sitting up close	28: Shokan sitting	#VALUE!	Painting
29	Spring, summer pasture, food preparation	29: spring, jaylau, food preparation	#VALUE!	Painting
30	Haymaking	30: haymaking	#VALUE!	Painting
31	Mountains and water	31: mountains and water	#VALUE!	Painting
32	Man with a newspaper (or letter) and dagger	32: man with newspaper	#VALUE!	Painting
33	Medeu (ice skating rink / area in Almaty)	33: Medeu	#VALUE!	Painting
34	Hydroelectric power station (HPP)	34: hydroelectric station (HES)	#VALUE!	Painting
35	Showcase with jewelry	35: display case with jewelry	#VALUE!	Jewelry Art
36	Tapestry — tree	36: tapestry - tree	#VALUE!	Tapestry Art
37	Tapestry — chess	37: tapestry - chessboard	#VALUE!	Tapestry Art
38	Tapestry — red	38: red tapestry	#VALUE!	Tapestry Art
39	Horses on summer pasture	39: horses on jaylau	#VALUE!	Painting
40	Abishev — “Cry”	40: Abishev – Call	#VALUE!	Sculpture
41	Aitbayev — “Happiness”	41: Aitbayev – Happiness	#VALUE!	Painting
42	Akhmetov — “Composition 4”	42: Akhmetov – Composition 4	#VALUE!	Sculpture
43	Dosmagambetov — “Suleimenov”	43: Dosmogambetov – Suleymenov	#VALUE!	Sculpture
44	Yesenbayev — “Saule”	44: Esenbayev – Saule	#VALUE!	Sculpture
45	Yesirkayev — “Sounds of the Kobyz”	45: Esirkeev – Sounds of Kobyz	#VALUE!	Painting
46	Zhumabay — “Three Swords”	46: Jumabay – Three swords	#VALUE!	Sculpture
47	Kazaryan — “Family”	47: Kazaryan – Family	#VALUE!	Sculpture
48	Mullashev — “Triptych”	48: Mullashev – Triptych	#VALUE!	Painting
49	Prokopyeva — “Suleimenov”	49: Prokopeva – Suleymenov	#VALUE!	Sculpture
50	Sydykhanov — “The She-Camel”	50: Sydyhanov – camel	#VALUE!	Painting
