# Supplementary material for: Comparative evaluation of machine learning models for museum exhibit recognition from video-derived datasets
Source: PeerJ journal article supplement (doi:10.7717/peerj-cs.3207), 2025-10-02
Supplement: Translation_StaffER.docx [file Translation_StaffER.docx]

| **Original word** | **Translation** |
| --- | --- |
| Параметры | Parameters |
| Проверка и балансировка классов | Checking and balancing classes |
| Cортируем классы | Sorting classes |
| Распределение классов | Class distribution |
| Генератор данных | Data generator |
| Используем ConvNeXt-Tiny | Using ConvNeXt-Tiny |
| Размораживаем только верхние 50 слоёв | Unfreeze only the top 50 layers |
| Построение модели | Model building |
| Компиляция модели | Model compilation |
| Обучение модели | Model training |
| Сохранение модели | Model saving |
| Модель сохранена в формате Keras | Model saved in Keras format |
| Конвертация модели в TFLite | Model conversion to TFLite |
| Сохранение TFLite модели | TFLite model saving |
| Модель успешно сохранена в формате TFLite | Model successfully saved in TFLite format |
| Вычисление метрик на валидационном наборе | Calculating metrics on the validation set |
| Confusion Matrix (нормализованная) | Confusion Matrix (normalized) |
| Precision, Recall, F1-score | Precision, Recall, F1-score |
| Mean Average Precision at IoU=0.5 и IoU=0.5:0.95 | Mean Average Precision at IoU=0.5 and IoU=0.5:0.95 |
| Исключаем слишком малые значения | Excluding very small values |
| Разбивка данных на тренировочную, валидационную и тестовую выборки | Splitting data into training, validation, and test sets |
| Исходная папка с 51 классом | Source folder with 51 classes |
| Целевая папка | Target folder |
| Фиксируем seed | Fixing the seed |
| Целевые подпапки | Target subfolders |
| Создание структуры папок | Creating folder structure |
| Обработка всех классов | Processing all classes |
| Разделение классов | Splitting classes |
| чтобы сумма всегда = n_total | so that the sum always equals n_total |
| Разделение завершено. Данные готовы в папке: | Splitting completed. Data is ready in the folder: |
| Параметры | Parameters |
| Проверка и балансировка классов | Checking and balancing classes |
| Распределение классов | Class distribution |
| Генерация данных с аугментацией | Data generation with augmentation |
| Создание модели MobileNetV3Small | Creating MobileNetV3Small model |
| Размораживаем верхние 50 слоев | Unfreezing the top 50 layers |
| Обучение модели | Model training |
| Классы и индексы | Classes and indices |
| Сохранение модели | Model saving |
| Модель сохранена в формате Keras | Model saved in Keras format |
| Конвертация модели в TFLite | Model conversion to TFLite |
| Оптимизация модели | Model optimization |
| Сохранение TFLite модели | Saving TFLite model |
| Модель успешно сохранена в формате TFLite | Model successfully saved in TFLite format |
| Вычисление метрик на валидационном наборе | Calculating metrics on validation set |
| Confusion Matrix (нормализованная) | Confusion Matrix (normalized) |
| Mean Average Precision at IoU=0.5 и IoU=0.5:0.95 | Mean Average Precision at IoU=0.5 and IoU=0.5:0.95 |
| Исключаем слишком малые значения | Excluding very small values |
| Размер входного изображения | Input image size |
| Количество каналов | Number of channels |
| Количество классов | Number of classes |
| Количество эпох | Number of epochs |
| Размер батча | Batch size |
| Скорость обучения | Learning rate |
| Путь к данным | Path to data |
| Точность на тестовых данных | Test accuracy |
| Функция потерь | Loss function |
| Оптимизатор | Optimizer |
| Инициализация весов | Weight initialization |
| Слой свертки | Convolutional layer |
| Полносвязный слой | Fully connected layer |
| Слой пулинга | Pooling layer |
| Dropout слой | Dropout layer |
| Нормализация | Normalization |
| Обучающая выборка | Training dataset |
| Валидационная выборка | Validation dataset |
| Тестовая выборка | Test dataset |
| Метрики качества | Evaluation metrics |
| Матрица ошибок | Confusion matrix |
| Кривая обучения | Learning curve |
| Точность (accuracy) | Accuracy |
| Полнота (recall) | Recall |
| Точность (precision) | Precision |
| F-мера | F1-score |
| Разбивка данных на тренировочную, валидационную и тестовую выборки | Splitting data into training, validation, and test sets |
| Исходная папка с 51 классом | Source folder with 51 classes |
| Целевая папка | Target folder |
| Фиксируем seed | Fixing the seed |
| Целевые подпапки | Target subfolders |
| Создание структуры папок | Creating folder structure |
| Обработка всех классов | Processing all classes |
| Разделение классов | Splitting classes |
| чтобы сумма всегда = n_total | so that the sum always equals n_total |
| Разделение завершено. Данные готовы в папке: | Splitting completed. Data is ready in the folder: |
| Пути | Paths |
| Параметры | Parameters |
| Трансформации | Transformations |
| Датасеты | Datasets |
| === Модель SwinV2-Base === | === Model SwinV2-Base === |
| Оптимизация | Optimization |
| Обучение | Training |
| === Валидация === | === Validation === |
| === Графики === | === Plots === |
| === Финальное тестирование === | === Final testing === |
| === Classification Report (Final Test) === | === Classification Report (Final Test) === |
| Параметры | Parameters |
| Проверка и балансировка классов | Checking and balancing classes |
| Cортируем классы | Sorting classes |
| Распределение классов | Class distribution |
| Генератор данных с усиленной аугментацией (убран random_cutout) | Data generator with enhanced augmentation (random_cutout removed) |
| Количество классов | Number of classes |
| Получаем уникальные классы из train_generator | Get unique classes from train_generator |
| Модель VGG16 | VGG16 model |
| Размораживаем только верхние 50 слоёв | Unfreeze only the top 50 layers |
| Построение модели | Model construction |
| Повышенный Dropout для борьбы с переобучением | Increased Dropout to prevent overfitting |
| L2-регуляризация | L2 regularization |
| Компиляция модели с Label Smoothing и уменьшенным LR | Model compilation with Label Smoothing and reduced LR |
| Начальный LR = 2e-4 | Initial LR = 2e-4 |
| Label Smoothing 0.1 | Label Smoothing 0.1 |
| Callback для динамического уменьшения Learning Rate | Callback for dynamically reducing Learning Rate |
| Обучение модели с балансировкой классов | Model training with class balancing |
| Классы и индексы | Classes and indices |
| Инвертируем словарь | Invert dictionary |
| Сохранение модели | Model saving |
| Конвертация модели в TFLite | Model conversion to TFLite |
| Сохранение TFLite модели | TFLite model saving |
| Модель успешно сохранена в формате TFLite | Model successfully saved in TFLite format |
| Вычисление метрик на валидационном наборе | Computing metrics on the validation set |
| Confusion Matrix (нормализованная) | Confusion Matrix (normalized) |
| Precision, Recall, F1-score | Precision, Recall, F1-score |
| Исключаем слишком малые значения | Excluding very small values |
| Предобработка изображения |  |
| Проход по всем изображениям в папке | Loop through all images in the folder |
| Изображение | Image |
| Предсказанный класс | Predicted class |
